# Supplementary material
Source: PubMed Central journal article supplement (PMC8122220)
Supplement: NIHMS1636930-supplement-sup.pdf [file NIHMS1636930-supplement-sup.pdf]

**Supplemental Figure A** Schematic of MarkVCID procedures

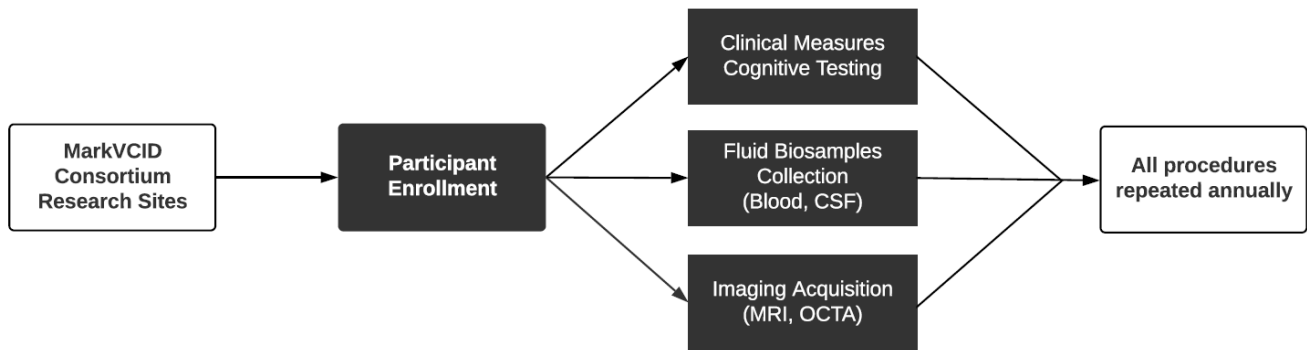

**Supplemental Table 1** MarkVCID Committee & subcommittee membership**Steering Committee**

|                     |                                                                                                                                                       |
|---------------------|-------------------------------------------------------------------------------------------------------------------------------------------------------|
| Co-chairs           | Steven Greenberg (Coordinating Center), Roderick Corriveau (NIH)                                                                                      |
| Voting Members      | Sudha Seshadri (CHARGE); Hanzhang Lu (JHU); Julie Schneider (Rush/IIT); Joel Kramer (UC); Donna Wilcock (UKy); Gary Rosenberg (UNM); Danny Wang (USC) |
| NIH                 | Linda McGavern, Francesca Bosetti, Claudia Moy, Debra Babcock, Jim Koenig, Jordan Gladman                                                             |
| Coordinating Center | Karl Helmer, Kristin Schwab, Pia Kivisäkk                                                                                                             |

Subcommittees:

**Clinical Data, Physiological Data & Cognitive Assessments**

|                     |                                                                                                                                                                                                                                                           |
|---------------------|-----------------------------------------------------------------------------------------------------------------------------------------------------------------------------------------------------------------------------------------------------------|
| Chair               | Deborah Blacker (Coordinating Center)                                                                                                                                                                                                                     |
| Voting Members      | Sudha Seshadri, Matthew Pase, Mitzi Gonzales (CHARGE); Marilyn Albert, Sandeepa Sur (JHU); Patricia Boyle, Melissa Lamar (Rush/IIT); Joel Kramer (UC); Richard Kryscio (UKy), Janice Knoefel, Jillian Prestopnik (UNM); John Ringman, Lina D'Orazio (USC) |
| NIH                 | Roderick Corriveau, Linda McGavern                                                                                                                                                                                                                        |
| Coordinating Center | Steven Greenberg, Karl Helmer, Lida Mazina, Kristin Schwab, Herpreet Singh, Anand Viswanathan, Victoria Williams, Hong Yu                                                                                                                                 |

**Imaging-based Biomarkers**

|                     |                                                                                                                                                                                                                                         |
|---------------------|-----------------------------------------------------------------------------------------------------------------------------------------------------------------------------------------------------------------------------------------|
| Co-chairs           | Konstantinos Arfanakis (Rush/IIT), Karl Helmer (Coordinating Center)                                                                                                                                                                    |
| Voting Members      | Lenore Launer, Claudia Satizabal (CHARGE); Hanzhang Lu, Yang Li (JHU); Konstantinos Arfanakis (Rush/IIT); Charles DeCarli, Lara Stables, Pauline Maillard (UC); Brian Gold (UKy); Arvind Caprihan (UNM); Amir Kashani, Danny Wang (USC) |
| NIH                 | Roderick Corriveau, Linda McGavern                                                                                                                                                                                                      |
| Coordinating Center | Bruce Fischl, Steven Greenberg, Andre van der Kouwe, Kristin Schwab, Herpreet Singh, Eric Smith                                                                                                                                         |

**Fluid-based Biomarkers**

|                     |                                                                                                                                                                                         |
|---------------------|-----------------------------------------------------------------------------------------------------------------------------------------------------------------------------------------|
| Chair               | Donna Wilcock (UKy)                                                                                                                                                                     |
| Voting Members      | Sudha Seshadri, Russell Tracy (CHARGE); Abhay Moghekar (JHU); Zoe Arvanitakis (Rush/IIT); Jason Hinman, Joel Kramer (UC); Donna Wilcock (UKy); Gary Rosenberg (UNM); Abhay Sagare (USC) |
| NIH                 | Roderick Corriveau, Linda McGavern                                                                                                                                                      |
| Coordinating Center | Steven Greenberg, Karl Helmer, Pia Kivisäkk, Kristin Schwab, Herpreet Singh, Anand Viswanathan                                                                                          |

**Protocol & Operations Standardization**

|                     |                                                                                                                                                             |
|---------------------|-------------------------------------------------------------------------------------------------------------------------------------------------------------|
| Co-chairs           | Gregory Jicha (UKy), Kristin Schwab (Coordinating Center)                                                                                                   |
| Voting Members      | Myriam Fornage (CHARGE); Sevil Yasar (JHU); Julie Schneider (Rush/IIT); Fanny Elahi (UC), Gregory Jicha (UKy); Jillian Prestopnik (UNM); Amir Kashani (USC) |
| NIH                 | Roderick Corriveau, Linda McGavern                                                                                                                          |
| Coordinating Center | Deborah Blacker, Karl Helmer, Kristin Schwab, Herpreet Singh                                                                                                |

**Sharing**

|                     |                                                                                                                                                                            |
|---------------------|----------------------------------------------------------------------------------------------------------------------------------------------------------------------------|
| Chair               | Steven Greenberg (Coordinating Center)                                                                                                                                     |
| Voting Members      | Josh Bis (CHARGE); Paul Rosenberg (JH); Julie Schneider (Rush/IIT); Jason Hinman (UC); Larry Goldstein (UKy); Jillian Prestopnik, Erika Partridge (UNM); Arthur Toga (USC) |
| NIH                 | Roderick Corriveau, Linda McGavern                                                                                                                                         |
| Coordinating Center | Deborah Blacker, Karl Helmer, Jonathan Rosand, Kristin Schwab, Alexander Sherman, Herpreet Singh                                                                           |

Abbreviations:

CHARGE, Cohorts for Heart and Aging Research in Genomic Epidemiology

JHU, Johns Hopkins University School of Medicine

Rush/IIT, Rush Medical Center &amp; Illinois Institute of Technology

UC, Universities of California San Francisco, Davis, and Los Angeles

UKy, University of Kentucky

UNM, University of New Mexico Health Sciences Center

USC, University of Southern California

**Supplemental Table 2** MarkVCID participant enrollment overview

| <b>Timeframe</b>       | <b>Site</b>       | <b>Source of Enrollment</b>                              | <b>Participant Groups</b>                                                                                                                                                                                                                                                                                                                              | <b>Key Inclusion/Exclusion Criteria</b>                                                                                                                                                                                |
|------------------------|-------------------|----------------------------------------------------------|--------------------------------------------------------------------------------------------------------------------------------------------------------------------------------------------------------------------------------------------------------------------------------------------------------------------------------------------------------|------------------------------------------------------------------------------------------------------------------------------------------------------------------------------------------------------------------------|
| Prospective enrollment | JHU [1]           | Clinic, community                                        | MCI/<br>Mild dementia<br><br>Cognitively normal                                                                                                                                                                                                                                                                                                        | <ul style="list-style-type: none"> <li>• Age 50 – 90</li> <li>• No history major stroke, traumatic brain injury</li> </ul>                                                                                             |
|                        | UC [2]            | Clinic, community                                        | MCI/<br>Dementia<br><br>Cognitively normal                                                                                                                                                                                                                                                                                                             | <ul style="list-style-type: none"> <li>• Age &gt;40</li> </ul>                                                                                                                                                         |
|                        | UKy [3]           | Clinic, community                                        | MCI+SVD                                                                                                                                                                                                                                                                                                                                                | <ul style="list-style-type: none"> <li>• Age ≥60 years</li> <li>• Fazekas WMH score ≥2</li> </ul>                                                                                                                      |
|                        |                   |                                                          | Cognitively normal + SVD                                                                                                                                                                                                                                                                                                                               | <ul style="list-style-type: none"> <li>• Age ≥65 years</li> <li>• Fazekas WMH score ≥1</li> <li>• Suboptimally controlled vascular risk factors (AHA criteria)</li> </ul>                                              |
|                        |                   |                                                          | Cognitively normal controls (-SVD)                                                                                                                                                                                                                                                                                                                     | <ul style="list-style-type: none"> <li>• Age ≥65 years</li> <li>• No poorly controlled vascular risk factors (AHA criteria)</li> </ul>                                                                                 |
|                        | UNM [4]           | Clinic, community                                        | SVD/MCI/MX (not demented)                                                                                                                                                                                                                                                                                                                              | <ul style="list-style-type: none"> <li>• Cognitive symptoms</li> </ul>                                                                                                                                                 |
|                        |                   |                                                          | Controls                                                                                                                                                                                                                                                                                                                                               | <ul style="list-style-type: none"> <li>• No vascular risk factors</li> <li>• No cognitive symptoms</li> </ul>                                                                                                          |
|                        | USC [5]           | Community                                                | MCI                                                                                                                                                                                                                                                                                                                                                    | <ul style="list-style-type: none"> <li>• Age &gt; 60</li> </ul>                                                                                                                                                        |
|                        |                   |                                                          | Cognitively normal                                                                                                                                                                                                                                                                                                                                     | <ul style="list-style-type: none"> <li>• No history symptomatic stroke, traumatic brain injury</li> </ul>                                                                                                              |
|                        |                   |                                                          | Pedigree-based                                                                                                                                                                                                                                                                                                                                         | <ul style="list-style-type: none"> <li>• Symptomatic from or at-risk for inheriting autosomal dominant Alzheimer’s disease</li> <li>• Age &gt;18</li> <li>• No history major stroke, traumatic brain injury</li> </ul> |
| UTHSCSA                | Clinic, community | Hispanic MCI or cognitively normal, high vascular burden | <ul style="list-style-type: none"> <li>• Hispanic ancestry by self-report</li> <li>• Age ≥ 55</li> <li>• No dementia, other neurodegenerative disease, traumatic brain injury, stroke within prior 3 months</li> <li>• ≥3 vascular risk factors OR presence of MRI marker of small vessel disease OR prior stroke/transient ischemic attack</li> </ul> |                                                                                                                                                                                                                        |
|                        |                   | Hispanic MCI or cognitively normal, low vascular burden  | <ul style="list-style-type: none"> <li>• 0-1 vascular risk factors AND absence of MRI marker of small vessel disease AND no prior stroke/transient ischemic attack</li> </ul>                                                                                                                                                                          |                                                                                                                                                                                                                        |
| Pre-existing data      | Rush/IIT [6,7]    | Community                                                | All cognitive statuses                                                                                                                                                                                                                                                                                                                                 | <ul style="list-style-type: none"> <li>• Age ≥65</li> <li>• No traumatic brain injury, other gross non-vascular abnormalities</li> </ul>                                                                               |
|                        | CHARGE            | Population                                               | All cognitive statuses                                                                                                                                                                                                                                                                                                                                 | <ul style="list-style-type: none"> <li>• ARIC [8]</li> <li>• CARDIA [9]</li> <li>• AGES-Reykjavik [10]</li> <li>• CHS [11]</li> <li>• FHS [12]</li> </ul>                                                              |

Abbreviations:

JHU, Johns Hopkins University School of Medicine

UC, Universities of California San Francisco, Davis, and Los Angeles

UKy, University of Kentucky

UNM, University of New Mexico Health Sciences Center

USC, University of Southern California

UTHSCSA, (CHARGE) University of Texas Health Science Center San Antonio

CHARGE, (Legacy) Cohorts for Heart and Aging Research in Genomic Epidemiology

Rush/IIT, Rush Medical Center & Illinois Institute of Technology

MCI, mild cognitive impairment

SVD, cerebral small vessel disease

WMH, white matter hyperintensity

ARIC, Atherosclerosis Risk in Communities

CARDIA, Coronary Artery Risk Development in Young Adults

AGES, Age, Gene/Environment Susceptibility

CHS, Cardiovascular Health Study

FHS, Framingham Heart Study

**Supplemental Table 3** Sample fluid collection and storage requirements

| Sample type          | Aliquot size | Aliquot number | Collection tube                                                                     | Storage tube                                             |
|----------------------|--------------|----------------|-------------------------------------------------------------------------------------|----------------------------------------------------------|
| Plasma               | 0.25ml       | 16-20          | 10ml BD Vacutainer EDTA Tube #366643                                                | 0.5ml Wheaton CryoELITE vial, DWK Life Sciences #W985874 |
| Packed cells         | 1.0ml        | 3-4            | Taken from plasma tube                                                              | 1.2ml Wheaton CryoELITE vial, DWK Life Sciences #W985862 |
| Platelet poor plasma | 0.25ml       | 16-20          | 6ml BD Whole Blood Vacutainer Tube with ACD Solution B Additive #364816             | 0.5ml Wheaton CryoELITE vial, DWK Life Sciences #W985874 |
| Serum                | 0.25ml       | 16-20          | 8.5ml BD SST Vacutainer Tube with Clot Activator and Separator Gel Additive #367988 | 0.5ml Wheaton CryoELITE vial, DWK Life Sciences #W985874 |
| CSF                  | 0.25ml       | 16-20          | 15 ml Polypropylene Conical Centrifuge Tubes Rose Scientific #17022                 | 0.5ml Wheaton CryoELITE vial, DWK Life Sciences #W985874 |

## REFERENCES

- [1] Sur SL, Li Y, Yasar S, Rosenberg P, Moghekar A, Hou X, Kalyani R, Hazel K, Pottanat G, Xu C, van Zijl P, Pillai J, Liu P, Albert M, Lu H. Brain small vessel reactivity predicts cognitive performance independent of Alzheimer pathology. *Neurology*. 2020 (in press)
- [2] Altendahl M, Maillard P, Harvey D, Cotter D, Walters S, Wolf A, Singh B, Kakarla V, Azizkhanian I, Sheth SA, Xiao G, Fox E, You M, Leng M, Elashoff D, Kramer JH, Decarli C, Elahi F, Hinman JD. An IL-18-centered inflammatory network as a biomarker for cerebral white matter injury. *PLoS One*. 2020; 15(1):e0227835.
- [3] Schmitt FA, Nelson PT, Abner E, Scheff S, Jicha GA, Smith C, et al. University of Kentucky Sanders-Brown Healthy Brain Aging Volunteers: Donor Characteristics, Procedures and Neuropathology. *Current Alzheimer Research*. 2012;9(6):724–33.
- [4] Erhardt EB, Pesko JC, Prestopnik J, Thompson J, Caprihan A, Rosenberg GA. Biomarkers identify the Binswanger type of vascular cognitive impairment. *Journal of Cerebral Blood Flow & Metabolism*. 2018;39(8):1602–12.
- [5] Varma R, Paz SH, Azen SP, et al. The Los Angeles Latino Eye Study: design, methods, and baseline data. *Ophthalmology* 2004;111:1121-1131
- [6] Bennett DA, Buchman AS, Boyle PA, Barnes LL, Wilson RS, Schneider JA. Religious Orders Study and Rush Memory and Aging Project. *J Alzheimer's Disease*. 2018;64(s1):S161-S189.
- [7] Barnes LL, Shah RC, Aggarwal NT, Bennett DA, Schneider JA. The Minority Aging Research Study: ongoing efforts to obtain brain donation in African Americans without dementia. *Current Alzheimer Research*. 2012;9(6):734-45.
- [8] The Atherosclerosis Risk in Communities (ARIC) Study: design and objectives. *American Journal of Epidemiology*. 1989;129(4):687–702.
- [9] Friedman GD, Cutter GR, Donahue RP, Hughes GH, Hulley SB, Jacobs DR, et al. Cardia: study design, recruitment, and some characteristics of the examined subjects. *Journal of Clinical Epidemiology*. 1988;41(11):1105–16.
- [10] Harris TB, Launer LJ, Eiriksdottir G, Kjartansson O, Jonsson PV, Sigurdsson G, et al. Age, Gene/Environment Susceptibility-Reykjavik Study: multidisciplinary applied phenomics. *American Journal of Epidemiology*. 2007;165(9):1076–87.
- [11] Fried LP, Borhani NO, Enright P, Furberg CD, Gardin JM, Kronmal RA, et al. The Cardiovascular Health Study: design and rationale. *Annals of Epidemiology*. 1991;1(3):263–76.
- [12] Andersson C, Johnson AD, Benjamin EJ, Levy D, Vasan RS. 70-year legacy of the Framingham Heart Study. *Nature Reviews Cardiology*. 2019;16(11):687–98.
